# Supplementary material for: Randomized Clinical Trials and Observational Tribulations: Providing Clinical Evidence for Personalized Surgical Pain Management Care Models
Source: MDPI journal article supplement (doi:10.3390/jpm13071044), 2023-06-25
Supplement: s1 [file s1]

**Supplementary Document S1.**

**Interamerican Society For Minimally Invasive Spine Surgery – La Sociedad Interamericana de Cirugía de Columna Mínimamente Invasiva (SICCMi)**

Kai-Uwe Lewandrowski

Morgan P. Lorio

Álvaro Dowling

Paulo Sérgio Teixeira De Carvalho

**The International Intradiscal Therapy Society (IITS.org)**

Kai-Uwe Lewandrowski

Anthony Yeung

**Brazilian Society For Thoracic Surgery – Sociedade Brasileira de Cirurgia Torácica (SBCT)**

Rossano Kepler Alvim Fiorelli

**International Society for Minimal Intervention in Spinal Surgery (ISMISS)**

Benedikt W. Burkhardt

Joachim M. Oertel

**the Chinese Orthopaedic Association – Minimally Invasive Surgery Section (COA-MIS Section)**

Huilin Yang

**the Iberolatinoamerican Spine Society – La Sociedad Iberolatinoamericana De Columna (SILACO)**

Jorge Felipe Ramírez León

Jaime Moyano

**Brazilian Society of Neurosurgery – Sociedade Brasileira de Neurocirurgia (SBNC)**

Roth AA Vargas
